1 **Expression from DIF1-motif promoters of *hetR* and *patS* is**  
2 **dependent on HetZ and modulated by PatU3 during heterocyst**  
3 **differentiation**

4 Yaru Du <sup>1, 3†</sup>, He Zhang <sup>1†</sup>, Hong Wang <sup>2, 3</sup>, Shuai Wang <sup>2</sup>, Qiqin Lei <sup>2</sup>, Chao Li <sup>2, 3</sup>,  
5 Renqiu Kong<sup>1,2</sup>, Xudong Xu <sup>1,2\*</sup>

6 1. State Key Laboratory of Freshwater Ecology and Biotechnology, Institute of  
7 Hydrobiology, Chinese Academy of Sciences, Wuhan, Hubei 430072, China

8 2. Key Laboratory of Algal Biology, Institute of Hydrobiology, Chinese Academy of  
9 Sciences, Wuhan, Hubei 430072, China

10 3. University of Chinese Academy of Sciences, Beijing 100049, China

11

12 **Received** April , 2020 **Accepted**

13

14 **Running title:** Role of HetZ and PatU3 in gene regulation

15

16

17

18 \*Corresponding author

19 Email: xux@ihb.ac.cn (XX)

20

21 †These authors contributed equally to this work.

## 22 **Abstract**

23 HetR and PatS/PatX-derived peptides are the activator and diffusible inhibitor for cell  
24 differentiation and patterning in heterocyst-forming cyanobacteria. HetR regulates  
25 target genes via HetR-recognition sites. However, some genes (such as *patS/patX*)  
26 upregulated at the early stage of heterocyst differentiation possess DIF1 (or DIF<sup>+</sup>)  
27 motif (TCCGGA) promoters rather than HetR-recognition sites; *hetR* possesses both  
28 regulatory elements. How HetR controls heterocyst-specific expression from DIF1  
29 motif promoters remains to be answered. This study presents evidence that the  
30 expression from DIF1 motif promoters of *hetR*, *patS* and *patX* is more directly  
31 dependent on *hetZ*, a gene regulated by HetR. The HetR-binding site upstream of *hetR*  
32 is not required for its autoregulation. PatU3 (3' portion of PatU) that interacts with  
33 HetZ may modulate HetZ-dependent gene expression. These findings contribute to  
34 understanding of the mutual regulation of *hetR*, *hetZ-patU* and *patS/patX* in a large  
35 group of multicellular cyanobacteria.

36

37

38

39

40

41

42

## 43 **Introduction**

44 Cyanobacteria were the first group of microorganisms that performed oxygenic  
45 photosynthesis [1, 2]. In the early earth environment, nitrogen nutrient was a limiting  
46 factor for propagation of microbes. Under this selective pressure, *nif* genes spread  
47 among bacteria, and some cyanobacteria acquired the N<sub>2</sub> fixation capability. With the  
48 rise of atmospheric oxygen, certain filamentous species developed the capability to  
49 form specialized N<sub>2</sub>-fixing cells, called heterocysts, to protect nitrogenase from  
50 inactivation by oxygen [3-5]. Nowadays, heterocyst-forming cyanobacteria contribute  
51 significantly to nitrogen fixation in the earth's biosphere [6-8]. In species from  
52 different genera of heterocyst-forming cyanobacteria, heterocysts are differentiated at  
53 one end, two ends, or intercalary positions of filaments [9]. *Anabaena* sp. PCC 7120  
54 (hereafter *Anabaena* 7120) was derived from a species that produces semi-regularly  
55 spaced single heterocysts along non-branched filaments in response to nitrogen  
56 stepdown. It is the most often used model strain for molecular studies on  
57 heterocyst-related topics [10].

58 Heterocyst differentiation and pattern formation largely depend on the key  
59 regulator HetR [11] and RGSGR-containing peptides, which are derived from PatS  
60 [12, 13], PatX [14] or HetN [15], representing an example of the most ancient  
61 activator-inhibitor (reaction-diffusion) patterning process [16-18]. In *Anabaena* 7120,  
62 PatS is the main source of morphogen for de novo pattern formation [13], while HetN  
63 is required for maintenance of the pattern [19]. HetR is the only known target of

64 RGSGR-containing peptides [20], and it binds to consensus recognition sites  
65 upstream of *hetP* [21, 22], *hetZ* [23] and several other genes, including its own  
66 encoding gene [24-26]. Among these genes, *hetZ* is involved in control of heterocyst  
67 differentiation at an early stage [27], and *hetP* is required for commitment to  
68 heterocyst differentiation [28]. *hetZ* and *hetP* functionally overlap with each other,  
69 and co-expression of these two genes was shown to restore heterocyst formation in  
70 *hetR*-null mutants [29]. In a different substrain of *Anabaena* 7120, expression of *hetZ*  
71 alone restored heterocyst formation in a *hetR*-deletion mutant [30]. The variable  
72 requirement for *hetP* expression may depend on differences in genetic backgrounds of  
73 substrains [31]. *hetP* and *hetZ* are both upregulated in differentiating cells, as a result  
74 of the accumulation of HetR [21, 23]. *patS* is also upregulated in differentiating cells  
75 [12], but no consensus recognition site for HetR is present in the sequence upstream  
76 of *patS*.

77 Immediately downstream of *hetZ* in many filamentous cyanobacteria is a gene  
78 called *patU*; these two genes, together with *hetR*, are listed among the core set of  
79 genes for filamentous species [27, 32]. In *Anabaena* 7120, *patU* is split into *patU5*  
80 and *patU3* [27]. *hetZ* and *patU3* play opposite roles in heterocyst differentiation: *hetZ*  
81 promotes, while *patU3* inhibits [27].

82 Before the consensus HetR-recognition sequence was identified, DIF<sup>+</sup> (later  
83 called DIF1) motif (TCCGGA) had been bioinformatically identified in sequences  
84 upstream of *hetR* and several other genes in *Anabaena* 7120 [33]. More recently, the  
85 DIF1 motif was proposed as a consensus regulatory sequence (centered at -35 region)

86 for *patS* and *patX* in heterocyst-forming cyanobacteria [34]. The role of DIF1 motif in  
87 expression of the *nsiR* promoter [33] and a synthetic minimal promoter has been  
88 reported [35]. However, the role of predicted DIF1 motif promoters in expression of  
89 *hetR*, *patS* and *patX* has not been shown experimentally. In particular,  
90 HetR-recognition site and DIF1 motif are both present upstream of *hetR*. Most  
91 importantly, which of HetR, HetZ and HetP is required for the regulation of  
92 DIF1-motif promoters? In *Anabaena* 7120, deletion of *hetZ* blocked the induced  
93 expression of *hetR*, *hetP* and *patS*, whereas *hetP* showed no effects on these genes  
94 [30]. This result excluded HetP, but did not establish either HetR or HetZ, as the  
95 factor required for the induced expression of *hetR* and *patS*. More generally, the  
96 expression from DIF1 motif promoters is dependent on a functional *hetR* [33, 36]. In  
97 this study, we found that HetZ is more directly involved in the regulation of  
98 DIF1-motif promoters of *hetR* and *patS*. In addition, PatU3 that interacts with HetZ  
99 may modulate the expression of these genes.

100

## 101 **Materials and methods**

### 102 **General**

103 *Anabaena* 7120 and derivatives, listed in Table S1, were cultured in BG11 medium in  
104 the light of 30  $\mu\text{E m}^{-2} \text{s}^{-1}$  on a rotary shaker. Erythromycin (5  $\mu\text{g ml}^{-1}$ ), neomycin (20  
105  $\mu\text{g ml}^{-1}$ ) or spectinomycin (10  $\mu\text{g ml}^{-1}$ ) was added to the medium as appropriate. For  
106 nitrogen stepdown, *Anabaena* 7120 grown in BG11 ( $\text{OD}_{730}$ , 0.7~0.9) was collected by  
107 centrifugation, washed 3 times with BG11<sub>0</sub> (without nitrate) and resuspended in the

108 same medium for indicated hours. Microscopy was performed as previously described  
109 [38].

110

### 111 **Construction of plasmids and *Anabaena* strains**

112 Plasmid construction processes are described in Table S1 in the supplemental  
113 materials. DNA fragments cloned by PCR were confirmed by sequencing.

114 Plasmids were introduced into *Anabaena* 7120 and mutants by conjugation [48].

115 Homologous double-crossover recombinants were generated based on positive  
116 selection with *sacB* [49]. The complete segregation of mutants was confirmed by PCR.

117 *Anabaena* strains and primers are listed in Table S1.

118

### 119 **Transcription analyses**

120 RNA extraction, elimination of residual DNA and reverse transcriptase quantitative  
121 polymerase chain reaction (RT-qPCR) were performed as we described before [29].

122 PCR primers (indicated with ‘RT’ in name) are listed in Table S1.

123 Promoter activities were visualized using *gfp* (green fluorescence protein) as the  
124 reporter gene. Relative copy numbers of zeta- or pDU1-based plasmids (relative to  
125 *rnpB*) were evaluated by quantitative PCR as described in the reference [26] using  
126 primers *gfp*-1/*gfp*-2, pDU1-1/pDU1-2 and *rnpB*-1/*rnpB*-2 listed in Table S1.

127

### 128 **Rapid amplification of cDNA ends (RACE)**

129 RACE was performed according to Zhang et al. [27], using universal

130 primer/hetR-race-1 and nested universal primer/hetR-race-2 as the primers for 2  
131 rounds of PCR. The universal primer and nested universal primer were provided with  
132 the SMART RACE cDNA amplification kit (Clontech, TaKaRa Bio., Otsu, Japan);  
133 hetR-race-1 and hetR-race-2 are listed in Table S1. Transcription start points were  
134 determined based on sequencing of RACE products. Two biological repeats showed  
135 similar results.

136

### 137 **Western blot analysis**

138 *Anabaena* 7120 was deprived of fixed nitrogen for 24 h, harvested by centrifugation,  
139 washed with 20 mM Tris-HCl (pH 8.0) containing 1 mM PMSF and resuspended in  
140 the same buffer. Cells were broken with a French press (SCIENTZ, China) at 240  
141 MPa (cell pressure) and centrifuged at  $12,000 \times g$  for 15 min. The supernatant was  
142 used as cell extracts for the Western blot analysis.

143 Proteins were separated by 12% SDS-PAGE and electro-blotted onto NC filters.  
144 HetR and HetZ were detected with rabbit antiserum against purified HetR or HetZ  
145 overproduced in *Escherichia coli*, visualized using alkaline phosphatase-conjugated  
146 secondary antibody specific for rabbit IgG (Thermo Scientific, USA) with NBT and  
147 BCIP as substrates. Two biological repeats showed similar results.

148

## 149 **Results**

### 150 **Upregulated expression from $P_{hetR}$ and $P_{patS}$ in *hetR*-minus heterocysts**

151 In a *hetR*-minus mutant, heterocyst differentiation is not initiated, and genes otherwise

152 specifically expressed in heterocysts are mostly not upregulated after nitrogen  
153 stepdown. Such genes could be directly or indirectly regulated by HetR. Under our  
154 conditions, co-expression of *hetZ* and *hetP* from  $P_{ntcA}$  (rather than expression of *hetZ*  
155 or *hetP* alone from the same promoter) enabled the *hetR* mutant, 7120*hetR*::C.CE2, to  
156 form functional heterocysts at the ends of filaments [29]. Such a phenotype was  
157 probably due to the lack of expression of *patA*, a gene required for heterocyst  
158 formation at intercalary positions, in vegetative cells of the *hetR* mutant [26].  
159 Formation of functional *hetR*-minus heterocysts [29] indicated that genes required for  
160 the function of heterocysts are properly expressed but not necessarily that  $P_{hetR}$  and  
161  $P_{patS}$  are upregulated in (pro)heterocysts. This system allowed us to test the promoters  
162 of *hetR* and *patS* in (pro)heterocysts without the presence of HetR.

163 Plasmids carrying  $P_{ntcA}$ -*hetZ*-*hetP* and the structure ‘ $\Omega$ -promoter-*gfp*’ (the  $\Omega$   
164 cassette terminates background transcription, ref. 37; *gfp*, green fluorescence protein)  
165 were constructed and introduced into the *hetR* mutant. The tested promoters included  
166  $P_{hetR}$ ,  $P_{patS}$ ,  $P_{hepB}$  and  $P_{hglD}$ . *hepB* and *hglD* are involved in the formation of heterocyst  
167 envelope polysaccharide layer and glycolipid layer respectively, therefore  $P_{hepB}$  and  
168  $P_{hglD}$  were included as the controls for heterocyst-specific expression [38]. Without a  
169 functional *hetR*, overexpression of *hetZ* and *hetP* led to heterocyst formation at the  
170 ends of filaments and upregulated expression of *gfp* from  $P_{hetR}$ ,  $P_{patS}$ ,  $P_{hepB}$  and  $P_{hglD}$  in  
171 heterocysts relative to vegetative cells (Fig. 1). Clearly, HetR is not essential for the  
172 expression from all these promoters.

173



174 **Fig 1.** Light (I), autofluorescence (II) and GFP fluorescence (III) photomicrographs showing the  
175 expression of *gfp* from the promoter of *hetR*, *patS*, *hepB* or *hglD* in *hetR*-minus heterocysts.  
176 Plasmids with  $P_{nrcA}$ -*hetP*-*hetZ* and  $\Omega$ -promoter-*gfp* ( $P_{hetR}$ ,  $P_{patS}$ ,  $P_{hepB}$  and  $P_{hglD}$  carried on pHB6316,  
177 pHB6226, pHB6317 and pHB6318 respectively) were introduced into *Anabaena* 7120  
178 *hetR*::C.CE2. Solid arrowheads point to heterocysts.  
179

## 180 **Upregulation of *patS* in heterocysts depends on the DIF1 motif and *hetZ***

181 In the previous study [29], we examined the expression of several genes in *Anabaena*  
182 7120 and *hetZ*, *hetP* mutants. Using the same mRNA samples, we also performed  
183 RT-qPCR analysis of *patS*. The expression of *patS* was shown to be dependent on  
184 *hetZ* rather than *hetP* (S1 Fig). Consistently, *patS* was upregulated in a  $\Delta$ *hetP* mutant  
185 but not in a  $\Delta$ *hetZ* mutant [30].

186 To confirm the role of HetZ in expression of *patS*, we further generated a partial  
187 deletion mutant, 7120*hetZ*del4-201, of *Anabaena* 7120 with 66 amino acids near the  
188 N-terminus of HetZ deleted in frame while preserving the putative promoter internal  
189 to *hetZ* serving *patU5*-*patU3* [27]. This mutant showed no morphologically  
190 discernible heterocyst differentiation but formed some cells with less autofluorescence  
191 after nitrogen stepdown. These cells initiated differentiation, but the differentiation  
192 process ceased at the very early stage. The decreased autofluorescence is due to the  
193 degradation of phycobilisomes [39]. A non-replicative plasmid (pHB6069) containing  
194  $P_{patS}$  (-1070 ~ +48 relative to the translational start site of *patS*) upstream of *gfp* was  
195 integrated into the genomes of *Anabaena* 7120 and the derivative strain  
196 7120*hetZ*del4-201 via homologous single-crossover recombination. *Anabaena*

197 7120::pHB6069 showed moderate expression of *gfp* specifically in (pro)heterocysts,  
198 whereas 7120*hetZ*del4-201::pHB6069 showed much weaker (but visible) expression  
199 of *gfp* in differentiating cells (Fig. 2A).

200

201 **Fig 2.** Expression of *gfp* from the *patS* promoter in *Anabaena* 7120 and 7120*hetZ*del4-201. Light  
202 (I), autofluorescence (II) and GFP fluorescence (III) photomicrographs of *Anabaena* derivative  
203 strains were taken at 24 h after nitrogen stepdown. Solid and empty arrowheads point to  
204 heterocysts and differentiating cells. Means  $\pm$  SD are relative copy numbers of plasmids (relative  
205 to the copy number of *rnpB* in the genome). (A) Expression of *gfp* from the full-length *patS*  
206 promoter in the genome. The plasmid pHB6069 with P<sub>*patS*</sub>-*gfp* was integrated into the chromosome  
207 of *Anabaena* 7120 and the *hetZ* mutant via homologous single-crossover recombination. In the  
208 schematic diagram for the structure of full-length P<sub>*patS*</sub> fused to *gfp*, the bent line with an empty  
209 arrowhead indicates the transcription start point of the DIF1-motif promoter. (B) Expression of *gfp*  
210 from the minimal DIF1-motif promoter on zeta-based plasmids in *Anabaena* 7120 and the *hetZ*  
211 mutant. pHB6486 and pHB6458 are plasmids with the minimal DIF1-motif promoter of *patS*, with  
212 TCCGGA substituted or not. The stem-loop structure stands for the transcription terminator at the  
213 end of  $\Omega$  cassette.

214

215 Employing *gfp* as a reporter gene in *Anabaena* 7120, we delimited the promoter  
216 of *patS* to the region -662 ~ -457 upstream of the start codon (S2 Fig, see  
217 photomicrographs for expression of *gfp* from fragments i, ii and iii). In this region,  
218 there is a DIF1 motif (TCCGGA) located 35 bp upstream of the *tsp* (transcriptional  
219 start point) -580 of *patS* [34]. We constructed a zeta-based plasmid with the minimal  
220 DIF1-motif promoter (a 41-bp fragment) positioned upstream of *gfp* (pHB6458) and a  
221 similar plasmid with TCCGGA replaced with GATATC (pHB6486). GFP was  
222 expressed in (pro)heterocysts of *Anabaena* 7120 [pHB6458] but not in differentiating

223 cells of 7120*hetZ*del4-201 carrying the same plasmid; substitutions at TCCGGA  
224 abolished the expression of *gfp* in the wild-type strain (Fig. 2B). These results  
225 established that activation of *patS* in (pro)heterocysts largely depends on HetZ and the  
226 DIF1-motif promoter. Similarly, expression from the DIF1-motif promoter of *patX* is  
227 also dependent on the function of *hetZ* (S3 Fig).

228

### 229 **Upregulation of *hetR* in heterocysts depends on the DIF1 motif and *hetZ***

230 As shown with RT-qPCR, *hetR* was upregulated in the 7120*hetZ*del4-201 strain at 6 h  
231 after nitrogen stepdown (S4 Fig). However, the expression of *hetR* in *hetZ* mutants  
232 was probably not patterned [27].

233 *hetR* is an autoregulated gene [40], and a potential HetR-binding site has been  
234 identified upstream of the *tsp* -271 (for heterocyst-specific expression) [23, 26].  
235 Upstream of the same *tsp*, there is also a potential DIF1-motif promoter [33]. To  
236 clarify the role of the HetR-binding site and the DIF1 motif in expression of *hetR*, we  
237 compared the expression of *gfp* from the promoter (-695 ~ -250 relative to the  
238 translational start site) of *hetR* and the same DNA fragment without the HetR-binding  
239 site or the DIF1 motif. Expression from the promoter of *hetR* was upregulated in  
240 (pro)heterocysts of *Anabaena* 7120, and the upregulated expression was abolished by  
241 substitutions at the DIF1 motif but not at the HetR-binding site (Fig. 3).

242

243 **Fig 3.** Light (I) and GFP fluorescence (II) photomicrographs showing the expression of *gfp* from

244 the wild type or mutated promoter of *hetR* in *Anabaena* 7120. pHB6321: with the wild type  
245 promoter (-695 ~ -250) of *hetR*; pHB6322: with GGGN<sub>5</sub>CCC (potential HetR-binding site) in the  
246 promoter of *hetR* substituted with AAAN<sub>5</sub>TTT; pHB6323: with TCCGGA (DIF1 motif) in the  
247 promoter of *hetR* substituted with CAATTG. Solid arrowheads point to heterocysts; means  $\pm$  SD  
248 are relative copy numbers of plasmids.

249

250 To confirm the role of the DIF1 motif in heterocyst-specific expression of *hetR*,  
251 we constructed a zeta-based plasmid with the minimal DIF1-motif promoter (a 40-bp  
252 fragment) upstream of *gfp* (pHB6821) and introduced the plasmid into *Anabaena*  
253 7120 and the *hetZ* mutant. As shown in Fig. 4, GFP was expressed in (pro)heterocysts  
254 in *Anabaena* 7120 [pHB6821] but barely expressed in differentiating cells of the *hetZ*  
255 mutant. The copy numbers of zeta-based plasmids showed some changes in different  
256 strains but were still comparable in those in the same figure. Apparently, the  
257 upregulated expression of *hetR* in (pro)heterocysts is also mediated by HetZ via the  
258 DIF1 motif promoter.

259

260 **Fig 4.** Expression of *gfp* from the minimal DIF1-motif promoter of *hetR* on a zeta-based plasmid  
261 in *Anabaena* 7120 and 7120*hetZ*del4-201. Top: the minimal sequence of DIF1-motif promoter  
262 cloned upstream of *gfp* in pHB6821. Photographs: light (I), autofluorescence (II) and GFP  
263 fluorescence (III) photomicrographs of *Anabaena* 7120 and the *hetZ* mutant with pHB6821 at 24 h  
264 after nitrogen stepdown. Solid and empty arrowheads point to heterocysts and differentiating cells;  
265 relative copy numbers of plasmids are indicated as means  $\pm$  SD.

266

267 We further generated a mutant of *Anabaena* 7120, P<sub>*hetR*</sub>-DIF1<sup>-</sup>, with the DIF1

268 motif substituted with GATATC in the chromosomal DNA. Compared to the wild  
269 type, the  $P_{hetR}$ -DIF1<sup>-</sup> strain showed delayed heterocyst differentiation and lowered  
270 heterocyst frequency (Fig. 5). Using RACE-PCR, we confirmed that the tsp at  
271 nucleotide -272 (-271 in previous reports [41, 42]) upstream of *hetR* in the wild-type  
272 strain disappeared in  $P_{hetR}$ -DIF1<sup>-</sup>. Clearly, the DIF1 motif is required for the  
273 heterocyst-specific expression of *hetR* and normal heterocyst differentiation.

274

275 **Fig 5.** Differences between *Anabaena* 7120 and the  $P_{hetR}$ -DIF1<sup>-</sup> strain in heterocyst differentiation  
276 and expression of *hetR*. (A) Photomicrographs of *Anabaena* 7120 and the  $P_{hetR}$ -DIF1<sup>-</sup> strain at 24 h  
277 and 48 h after nitrogen stepdown. Frequencies of heterocysts/proheterocysts are indicated. (B) A  
278 stretch of sequence upstream of *hetR* showing the DIF1 motif, potential HetR-binding sequence  
279 and the tsp at -272.

280

### 281 **PatU3 interacts with HetZ and modulates the expression of *patS* and *hetR***

282 *hetZ* and *patU3* play opposite roles in heterocyst differentiation, whereas *patU5*  
283 (which lies between *hetZ* and *patU3*) is not involved in heterocyst differentiation [27].  
284 Employing the yeast two-hybrid system, we found that PatU3 interacts with HetZ (Fig.  
285 6A-i); by a pull-down experiment, we confirmed the interaction between the two  
286 proteins (Fig. 6B). As indicated in the two-hybrid assay, HetZ without the C-terminal  
287 portion no longer interacted with PatU3 (Fig. 6A-ii).

288

289 **Fig 6.** Interaction of PatU3 with HetZ. (A) Yeast two-hybrid assays of the interaction between  
290 PatU3 and HetZ. i) 1, pGBKT7-Lam + pGADT7-T, as the negative control; 2, pGBKT7-53 +

291 pGADT7-T, as the positive control; 3, pGBKT7-PatU3 + pGADT7-HetZ. ii) 1, pGBKT7-PatU3 +  
292 pGADT7-HetZ[2-144]; 2, pGBKT7-PatU3 + pGADT7-HetZ[145-288]; 3, pGBKT7-PatU3 +  
293 pGADT7-HetZ[289-401]. Bracketed numbers (amino acid residue no.) indicate the portion deleted  
294 from HetZ (which has a full length of 401 aa). (B) Pull-down assays of the interaction. Proteins  
295 were separated by SDS-PAGE (I) and analyzed with Western blot detection using anti-HA  
296 monoclonal antibody (II). 1, EF-Ts(HA)-HetZ; 2, MBP-PatU3 + MBP·Bind resin +  
297 EF-Ts(HA)-HetZ; 3, MBP-PatU3 + MBP·Bind resin + EF-Ts(HA); 4, MBP + MBP·Bind resin +  
298 EF-Ts(HA)-HetZ; 5, MBP + MBP·Bind resin + EF-Ts(HA); 6, EF-Ts(HA). (C) RT-qPCR  
299 analysis of mRNA abundance of *hetR*, *patS* and *hetZ* in *Anabaena* 7120 and the *patU3::C.K4*  
300 mutant at 6 h after nitrogen stepdown. Data are means  $\pm$  SD of 3 technical replicates.

301

302 The interaction between PatU3 and HetZ may modulate HetZ-dependent gene  
303 expression. Based on RT-qPCR analysis, we compared the expression of *hetR* and  
304 *patS* in the wild type and the 7120*patU3::C.K4* strain at 6 h after nitrogen stepdown  
305 (Fig. 6C). Relative to the wild type level, the mRNA level of *patS* was greatly  
306 increased in the *patU3* mutant, whereas that of *hetR* was slightly increased. Increased  
307 expression of *patS* probably inhibited the transcription of *hetZ* in the mutant ( $P_{hetZ-gfp}$   
308 in the mutant had shown a similar result, see ref. 27). However, the *patU3::C.K4*  
309 mutation did not change the abundance of proteins HetR and HetZ in *Anabaena*  
310 filaments (S5 Fig).

311

## 312 Discussion

313 HetR and PatS-derived peptides are key players for heterocyst differentiation and  
314 patterning in *Anabaena* 7120. How their encoding genes are regulated is an important

315 question for understanding the molecular mechanism of the differentiation/patterning  
316 process. In this study, we show that the DIF1 motif plays an important role in  
317 regulation of these genes and that expression from DIF1 promoters depends on the  
318 function of *hetZ*.

319         HetR is often considered as the master regulator of heterocyst differentiation,  
320 and it directly regulates the expression of *hetP* [21] and *hetZ* [23] in developing  
321 heterocysts via HetR-recognition sequences and is required for the expression of *patA*  
322 in vegetative cells [26]. How HetR controls the expression of *patS* and its own gene  
323 has not been clarified. By examining gene expression in *hetR*-minus heterocysts, we  
324 were able to show that HetR is non-essential for the upregulated expression from  
325 promoters of *hetR* and *patS* during heterocyst differentiation. Therefore, HetR may  
326 control the expression of these genes through other regulatory factors.

327         In sequences upstream of *hetR*, *patS* and *patX*, there are predicted DIF1-motif  
328 promoters. Synthetic minimal promoters of these genes all showed upregulated  
329 expression during heterocyst differentiation. Substitutions at the DIF1 motif greatly  
330 reduced the transcription activity of  $P_{patS}$ . A mutant of *Anabaena* 7120 with the DIF1  
331 motif of *hetR* substituted in the genome showed no transcription from the *tsp* -272 (or  
332 -271), which would otherwise be specifically activated in developing heterocysts [41].  
333 Upstream of *hetR*, there is also a potential HetR-recognition site, but that site was  
334 shown to be not required for the upregulated expression. These results provided  
335 experimental evidence for the role of DIF1-motif promoters in heterocyst-specific  
336 expression of *hetR*, *patS* and *patX*.

337 On a plasmid with *gfp* as the reporter gene, minimal DIF1-motif promoters for  
338 *hetR*, *patS* and *patX* showed greatly weakened transcription in the 7120 *hetZdel4-201*  
339 strain compared to those in the wild type. Expression of *gfp* from the full-length  
340 promoter of *patS* in the chromosome produced a similar result. Therefore, *hetZ* is  
341 required for the expression of DIF1-motif promoters.

342 Videau et al. showed that deletion of *hetZ* blocked the induced expression of  
343 *hetR*, *hetP* and *patS* [30]. A similar effect of *hetZ* mutation on the expression of *patS*  
344 had been shown in our previous study [27]. These observations could be explained as  
345 dependence of the expression of *patS* on either HetR or HetZ or both. In this study,  
346 we showed that HetR is not essential for the heterocyst-specific expression of *patS*  
347 and that HetZ is more directly involved in regulation of *patS*. For *hetR*, we found that  
348 the DIF1 motif rather than the HetR-binding site is required for the heterocyst-specific  
349 expression.

350 For the results we presented, two points need to be addressed in particular. (1)  
351 HetR and the global nitrogen regulator NtcA are dependent on each other for  
352 upregulated expression during heterocyst differentiation [43], how to explain the  
353 upregulation of  $P_{hetR}$  in a *hetR*-minus background? There is no evidence that NtcA and  
354 HetR directly regulates each other. In at least one substrain of *Anabaena* 7120, NrrA  
355 mediates the regulation of *hetR* by NtcA [44, 45]. Proteins that mediate the regulation  
356 of *ntcA* by HetR have not been identified. Formation of functional heterocysts in the  
357 *hetR* mutant with  $P_{ntcA}$ -*hetZ*-*hetP* implies that genes regulated by NtcA are properly  
358 expressed in developing cells. Presumptively, the expression of *hetZ* and *hetP* from



359  $P_{ntcA}$  allowed sufficient expression of NtcA in developing cells, and NtcA in turn  
360 enhances the expression of  $P_{ntcA}$ -*hetZ*-*hetP* and indirectly upregulates  $P_{hetR}$ . (2) How to  
361 explain the differentiating cells in the 7120del*hetZ*4-201 mutant? In this *hetZ* mutant  
362 generated with the substrain of *Anabaena* 7120 in our laboratory, we found that the  
363 mRNA level of *hetR* was increased after nitrogen stepdown as in the wild type (S4  
364 Fig), even though the expression was probably not patterned. The expression of *hetR*  
365 can initiate cell differentiation (that ceases at the very early stage) in a less regular  
366 pattern (consistent with the low expression of *patS*).

367 In addition to HetZ, we also analyzed PatU3, an inhibitory protein factor for  
368 heterocyst differentiation. Protein interaction assays indicated that PatU3 interacts  
369 with HetZ. In a *patU3* mutant, the transcription of *patS* was greatly enhanced, that of  
370 *hetR* slightly enhanced, *hetZ* greatly inhibited, relative to the wild type levels;  
371 however, the abundance of proteins HetR and HetZ remained unchanged. PatU3  
372 appeared to exert complicated effects on the expression of *hetR*, *hetZ* and *patS* at  
373 mRNA and protein levels. Presumptively, PatU3 can regulate the cellular  
374 concentration of free HetZ (relative to the PatU3-bound form) and affect the stability  
375 of HetZ, therefore modulate HetZ-dependent gene expression. However, PatU3 may  
376 also have additional functions that indirectly affect the expression of these genes.

377 As a gene directly regulated by HetR, *hetZ* is involved in initiation of heterocyst  
378 differentiation and regulation of *patS/patX* and *hetR*. Although there is no evidence  
379 that HetZ directly interacts with the DIF1 motif promoter, it is clear that HetZ is more  
380 direct than HetR in regulation of *patS/patX*. Therefore, HetR, HetZ and PatS/PatX

381 form a molecular circuit of mutual regulation (but the role of *patX* in de novo  
382 heterocyst patterning awaits experimental investigation). This conclusion is important,  
383 because HetZ provides an additional site for modulation of the expression of  
384 *patS/patX*, which are the sources of diffusible inhibitor for de novo pattern formation  
385 at the early stage. PatU3 is a candidate for the modulator. It interacts with HetZ and  
386 somehow modulates the expression of *hetR*, *hetZ* and *patS*. This coordination scenario  
387 involving multiple activating/inhibiting factors may help to refine the current models  
388 [46, 47] for heterocyst differentiation and patterning.

389

### 390 **Acknowledgements**

391 This work was supported by the National Natural Science Foundation of China (Grant  
392 numbers 31770044 and 31270132), the State Key Laboratory of Freshwater Ecology  
393 and Biotechnology at IHB, CAS (2019FBZ09) and the Knowledge Innovation Project  
394 of Hubei Province (2017CFA021).

395

### 396 **References**

- 397 1. Kopp RE, Kirschvink JL, Hilburn IA, Nash CZ. The paleoproterozoic snowball  
398 earth: a climate disaster triggered by the evolution of oxygenic photosynthesis. Proc  
399 Natl Acad Sci U S A. 2005; 102:11131-11136.
- 400 2. Rasmussen B, Fletcher IR, Brocks JJ, Kilburn MR. Reassessing the first appearance  
401 of eukaryotes and cyanobacteria. Nature. 2008; 455:1101-1104.
- 402 3. Latysheva N, Junker VL, Palmer WJ, Codd GA, Barker D. The evolution of

- 403 nitrogen fixation in cyanobacteria. *Bioinformatics*. 2012; 28:603–606.
- 404 4. Tomitani A, Knoll AH, Cavanaugh CM, Ohno T. The evolutionary diversification  
405 of cyanobacteria: Molecular-phylogenetic and paleontological perspectives. *Proc*  
406 *Natl Acad Sci U S A*. 2006; 103:5442-5447.
- 407 5. Pang K, Tang Q, Chen L, Wan B, Niu C, Yuan X, et al. Nitrogen-fixing  
408 heterocystous cyanobacteria in the Tonian period. *Curr Biol*. 2018; 28:616-622
- 409 6. Herridge DF, Peoples MB, Boddey RM. Global inputs of biological nitrogen  
410 fixation in agricultural systems. *Plant Soil*. 2008; 311:1-18.
- 411 7. Zehr JP. 2011. Nitrogen fixation by marine cyanobacteria. *Trends Microbiol*. 2011;  
412 19: 162-173.
- 413 8. Issa AA, Abd-Alla MH, Ohyama T. Nitrogen fixing cyanobacteria: future prospect,  
414 pp 23-48. In: Ohyama T, editor. *Advances in Biology and Ecology of Nitrogen*  
415 *Fixation (InTechOpen)*; 2014. doi:10.5772/56990.
- 416 9. Castenholz RW. Oxygenic photosynthetic bacteria. In: Boone DR, Castenholz RW,  
417 editors. *Bergey's Manual of Systematic Bacteriology*. New York: Springer; 2001.  
418 Pp. 474-487.
- 419 10. Wolk CP, Ernst A, Elhai J. Heterocyst metabolism and development. In: Bryant  
420 D, editor. *The Molecular Biology of Cyanobacteria*. Dordrecht/Netherland: Kluwer  
421 Academic Publishers; 1994. pp 769-823.
- 422 11. Buikema WJ, Haselkorn R. Expression of the *Anabaena hetR* gene from a  
423 copper-regulated promoter leads to heterocyst differentiation under repressing  
424 conditions. *Proc Natl Acad Sci U S A*. 2001; 98:2729–2734.

- 425 12. Yoon HS, Golden JW. Heterocyst pattern formation controlled by a diffusible  
426 peptide. *Science* 1998; 282: 935–938.
- 427 13. Zhang L, Zhou F, Wang S, Xu X. Processing of PatS, a morphogen precursor, in  
428 cell extracts of *Anabaena* sp. PCC 7120. *FEBS Lett* 2017; 591:751–759.
- 429 14. Elhai J, Khudyakov I. Ancient association of cyanobacterial multicellularity with  
430 the regulator HetR and an RGSGR pentapeptide-containing protein (PatX). *Mol*  
431 *Microbiol* 2018; 110:931-954.
- 432 15. Higa KC, Rajagopalan R, Risser DD, Rivers OS, Tom SK, Videau P, et al. The  
433 RGSGR amino acid motif of the intercellular signalling protein, HetN, is required  
434 for patterning of heterocysts in *Anabaena* sp. strain PCC 7120. *Mol Microbiol.*  
435 2012; 83:682-693.
- 436 16. Turing AM. The chemical basis of morphogenesis. *Philos Trans R Soc Lond B.*  
437 1952; 237:37-72.
- 438 17. Meinhardt H, Gierer A. Pattern formation by local self-activation and lateral  
439 inhibition. *Bioessays.* 2000; 22:753-760.
- 440 18. Kondo S, Miura T. Reaction-diffusion model as a framework for understanding  
441 biological pattern formation. *Science.* 2010; 329:1616-1620.
- 442 19. Callahan SM, Buikema WJ. The role of HetN in maintenance of the heterocyst  
443 pattern in *Anabaena* sp. PCC 7120. *Mol Microbiol.* 2001; 40: 941-950.
- 444 20. Hu HX, Jiang YL, Zhao MX, Cai K, Liu S, Wen B, et al. Structural insights into  
445 HetR-PatS interaction involved in cyanobacterial pattern formation. *Sci Rep.* 2015;  
446 5:16470. doi: 10.1038/srep 16470.

- 447 21. Higa KC, Callahan SM. Ectopic expression of *hetP* can partially bypass the need  
448 for *hetR* in heterocyst differentiation by *Anabaena* sp. strain PCC 7120. Mol  
449 Microbiol. 2010; 77:562–574.
- 450 22. Kim Y, Ye Z, Joachimiak G, Videau P, Young J, Hurd K, et al. Structures of  
451 complexes comprised of *Fischerella* transcription factor HetR with *Anabaena* DNA  
452 targets. Proc Natl Acad Sci USA. 2013; 110:E1716-1723.
- 453 23. Du Y, Cai Y, Hou S, Xu X. Identification of the HetR-recognition sequence  
454 upstream of *hetZ* in *Anabaena* sp. strain PCC 7120. J Bacteriol. 2012;  
455 194:2297-2306.
- 456 24. Videau P, Ni S, Rivers OS, Ushijima B, Feldmann EA, Cozy LM, et al.  
457 Expanding the direct HetR regulon in *Anabaena* sp. strain PCC 7120. J Bacteriol.  
458 2014; 196:1113-1121.
- 459 25. Flaherty BL, Johnson D, Golden JW. Deep sequencing of HetR-bound DNA  
460 reveals novel HetR targets in *Anabaena* sp. strain PCC 7120. BMC Microbiol.  
461 2014; 14:255. doi:10.1186/s12866-014-0255-x.
- 462 26. Hou S, Zhou F, Peng S, Gao H, Xu X. The HetR-binding site that activates  
463 expression of *patA* in vegetative cells is required for normal heterocyst patterning  
464 in *Anabaena* sp. PCC 7120. Sci Bull. 2015; 60:192-201.
- 465 27. Zhang W, Du Y, Khudyakov I, Fan Q, Gao H, Ning D, et al. A gene cluster that  
466 regulates both heterocyst differentiation and pattern formation in *Anabaena* sp.  
467 strain PCC 7120. Mol Microbiol. 2007; 66:1429-1443.
- 468 28. Videau P, Rivers OS, Hurd K, Ushijima B, Oshiro RT, Ende RJ, et al. The

- 469 heterocyst regulatory protein HetP and its homologs modulate heterocyst  
470 commitment in *Anabaena* sp. strain PCC 7120. Proc Natl Acad Sci U S A. 2016;  
471 113:E6984-E6992.
- 472 29. Zhang H, Wang S, Wang Y, Xu X. Functional overlap of *hetP* and *hetZ* in  
473 regulation of heterocyst differentiation in *Anabaena* sp. strain PCC 7120. J  
474 Bacteriol. 2018; 200:e00707-17.
- 475 30. Videau P, Rivers OS, Tom SK, Oshiro RT, Ushijima B, Swenson VA, et al. The  
476 *hetZ* gene indirectly regulates heterocyst development at the level of pattern  
477 formation in *Anabaena* sp. strain PCC 7120. Mol Microbiol. 2018; 109:91-104.
- 478 31. Wang Y, Gao Y, Li C, Gao H, Zhang CC, Xu X. Three substrains of the  
479 cyanobacterium *Anabaena* sp. PCC 7120 display divergence in genomic sequences  
480 and *hetC* function. J Bacteriol. 2018; 200:e00076-18.
- 481 32. Stucken K, John U, Cembella A, Murillo AA, Soto-Liebe K, Fuentes-Valdés JJ, et  
482 al. The smallest known genomes of multicellular and toxic cyanobacteria:  
483 comparison, minimal gene sets for linked traits and the evolutionary implications.  
484 PLoS One. 2010; 5: e9235. doi:10.1371/journal.pone.0009235.
- 485 33. Mitschke J, Vioque A, Haas F, Hess WR, Muro-Pastor AM. Dynamics of  
486 transcriptional start site selection during nitrogen stress-induced cell differentiation  
487 in *Anabaena* sp. PCC7120. Proc Natl Acad Sci U S A. 2011; 108:20130-20135.
- 488 34. Elhai J, Khudyakov I. Ancient association of cyanobacterial multicellularity with  
489 the regulator HetR and an RGSGR pentapeptide-containing protein (PatX). Mol  
490 Microbiol. 2018; 110:931-954.

- 491 35. Wegelius A, Li X, Turco F, Stensjö K. Design and characterization of  
492 a synthetic minimal promoter for heterocyst-specific expression in  
493 filamentous cyanobacteria. PLoS One. 2018; 13: e0203898.
- 494 36. Brenes-Álvarez M, Mitschke J, Olmedo-Verd E, Georg J, Hess WR, Vioque A, et  
495 al. Elements of the heterocyst-specific transcriptome unravelled by co-expression  
496 analysis in *Nostoc* sp. PCC 7120. Environ Microbiol. 2019; 21: 2544-2558.
- 497 37. Prentki P, Krisch HM. In vitro insertional mutagenesis with a selectable DNA  
498 fragment. Gene. 1984; 29:303-313.
- 499 38. Wang Y, Xu X. Regulation by *hetC* of genes required for heterocyst  
500 differentiation and cell division in *Anabaena* sp. strain PCC 7120. J Bacteriol. 2005;  
501 187: 8489-8493.
- 502 39. Baier, K., Lehmann, H., Stephan, D.P. and Lockau, W. NblA is essential for  
503 phycobilisome degradation in *Anabaena* sp. strain PCC 7120 but not for  
504 development of functional heterocysts. Microbiology. 2004; 150:2739-2749.
- 505 40. Black TA, Cai Y, Wolk CP. Spatial expression and autoregulation of *hetR*, a gene  
506 involved in the control of heterocyst development in *Anabaena*. Mol Microbiol.  
507 1993; 9:77-84.
- 508 41. Rajagopalan R, Callahan SM. Temporal and spatial regulation of the four  
509 transcription start sites of *hetR* from *Anabaena* sp. strain PCC 7120. J Bacteriol.  
510 2010; 192:1088-96.
- 511 42. Buikema WJ, Haselkorn R. Expression of the *Anabaena hetR* gene from a  
512 copper-regulated promoter leads to heterocyst differentiation under repressing

- 513 conditions. Proc Natl Acad Sci U S A. 2001; 98: 2729-2734.
- 514 43. Muro-Pastor AM, Valladares A, Flores E, Herrero A. Mutual dependence of the  
515 expression of the cell differentiation regulatory protein HetR and the global  
516 nitrogen regulator NtcA during heterocyst development. Mol Microbiol. 2002;  
517 44:1377-1385.
- 518 44. Ehira S, Ohmori M. NrrA, a nitrogen-responsive response regulator facilitates  
519 heterocyst development in the cyanobacterium *Anabaena* sp. strain PCC 7120. Mol  
520 Microbiol. 2006; 59:1692-1703.
- 521 45. Ehira S, Ohmori M. NrrA directly regulates expression of *hetR* during heterocyst  
522 differentiation in the cyanobacterium *Anabaena* sp. strain PCC 7120. J Bacteriol.  
523 2006; 188: 8520-8525.
- 524 46. Munoz-Garcia, J. and Ares, S. Formation and maintenance of nitrogen-fixing cell  
525 patterns in filamentous cyanobacteria. Proc Natl Acad Sci U S A. 2016;  
526 113:6218-6223.
- 527 47. Di Patti, F, Lavacchi L, Arbel-Goren R, Schein-Lubomirsky L, Fanelli D, Stavans  
528 J. Robust stochastic Turing patterns in the development of a one-dimensional  
529 cyanobacterial organism. PLoS Biol. 2018; 16:e2004877.
- 530 48. Elhai J, Wolk CP. Conjugal transfer of DNA to cyanobacteria. Methods Enzymol.  
531 1988; 167:747-754.
- 532 49. Cai YP, Wolk CP. Use of a conditionally lethal gene in *Anabaena* sp. strain PCC  
533 7120 to select for double recombinants and to entrap insertion sequences. J  
534 Bacteriol. 1990; 172:3138-3145.



535 **Supporting Information**

536 **S1 Fig.** RT-qPCR analyses showing the role of *hetZ* in expression of *patS* during  
537 heterocyst differentiation.

538 **S2 Fig.** Expression of *gfp* fused to fragments upstream of *patS* on a pDU1-based  
539 plasmid in *Anabaena* 7120.

540 **S3 Fig.** Light (I), autofluorescence (II) and GFP fluorescence (III) photomicrographs  
541 showing the expression of *gfp* from the DIF1-motif promoter of P<sub>*patX*</sub> in *Anabaena*  
542 7120 and 7120*hetZ*4-201.

543 **S4 Fig.** RT-qPCR analysis of the expression of *patS* and *hetR* in the wild type and the  
544 mutant 7120*hetZ* del4-201 at 0 and 6 h after nitrogen stepdown.

545 **S5 Fig.** Detection of HetR and HetZ in the wild type and the *patU3* mutant of  
546 *Anabaena* 7120 at 24 h after nitrogen stepdown.

547 **S1 Table.** *Anabaena* strains, plasmids and primers.

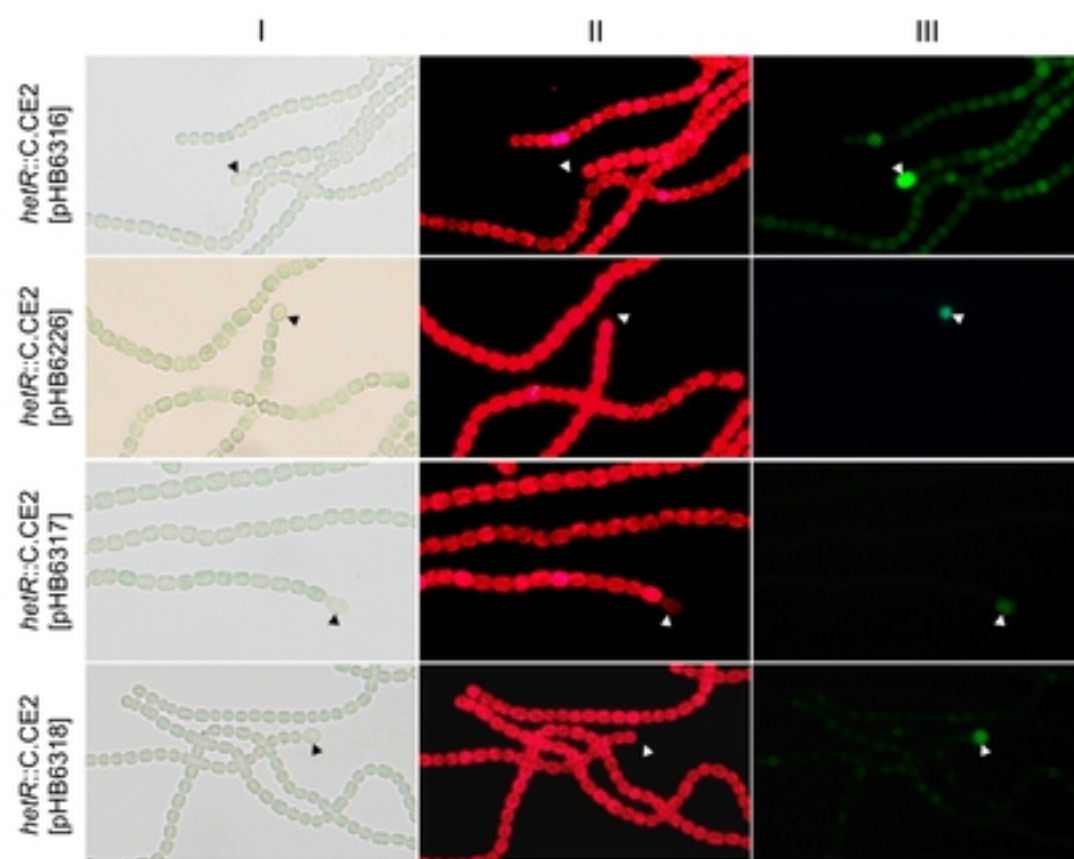

Fig. 1

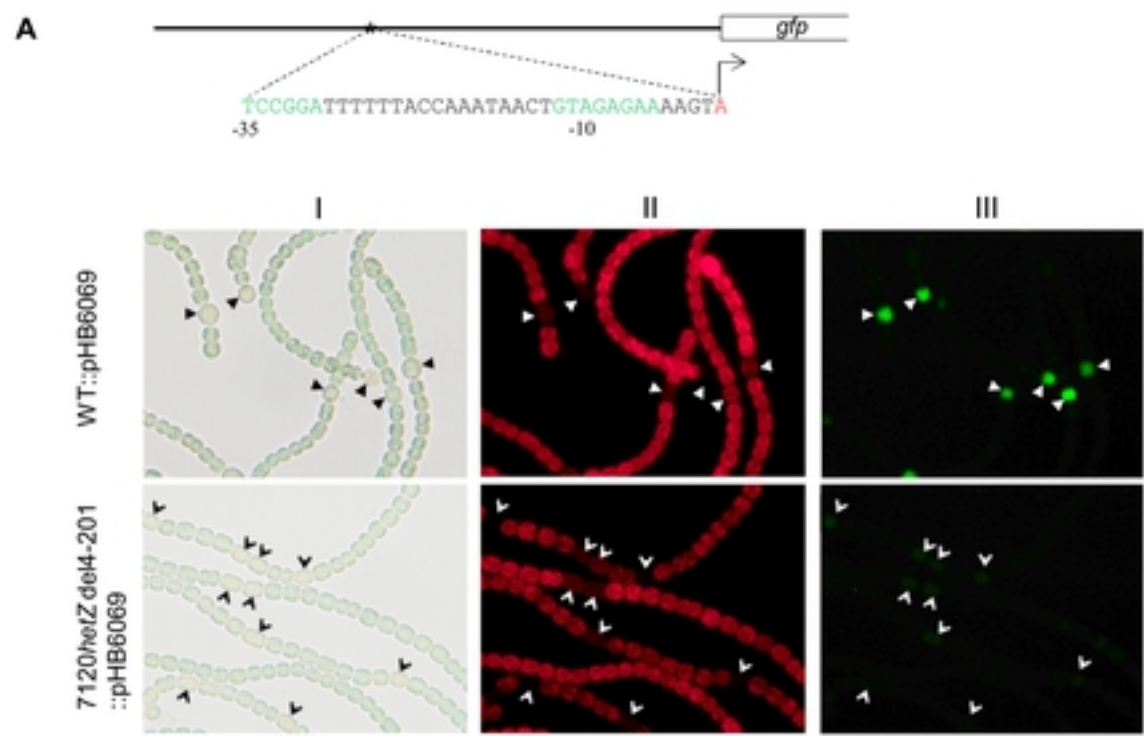

Fig. 2

Fig2A

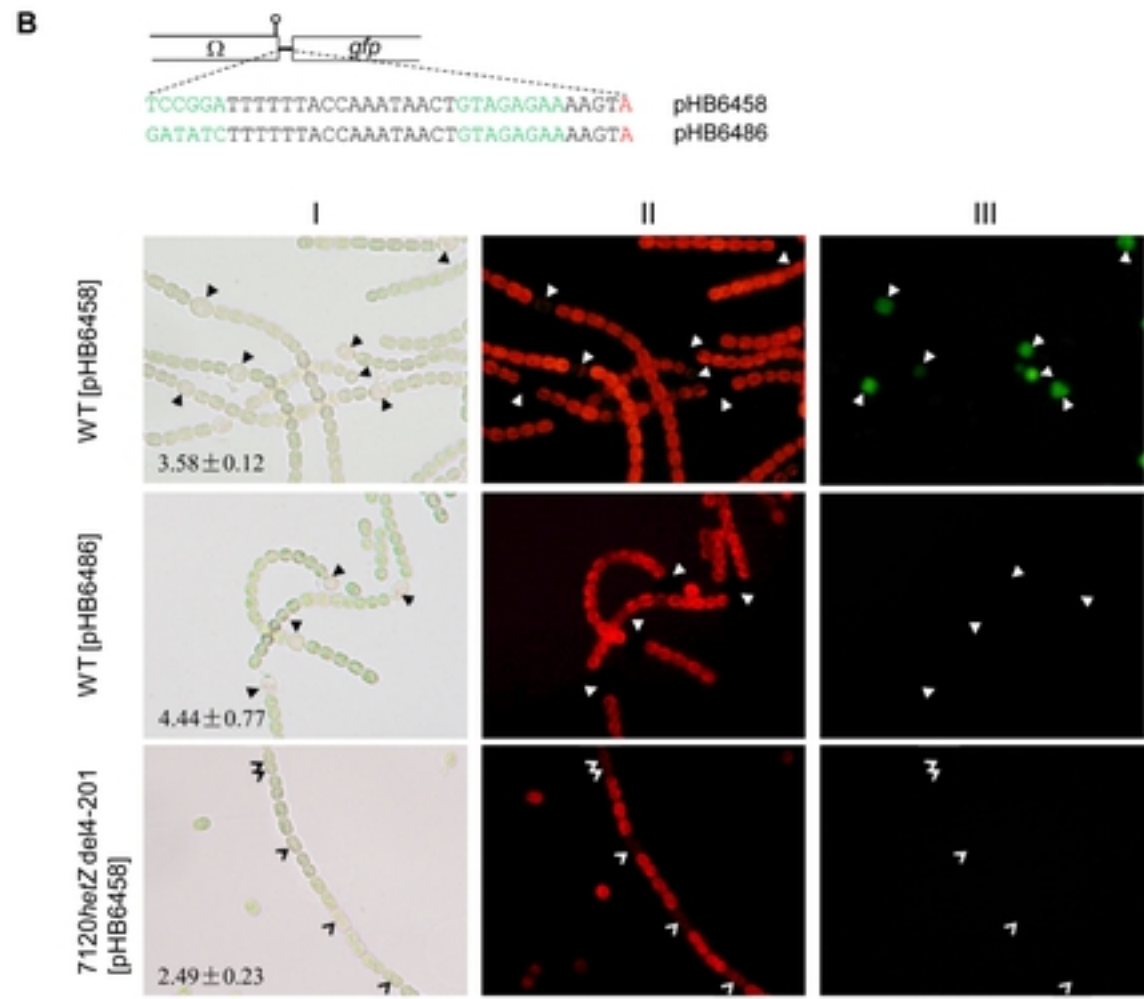

Fig. 2 (continued)

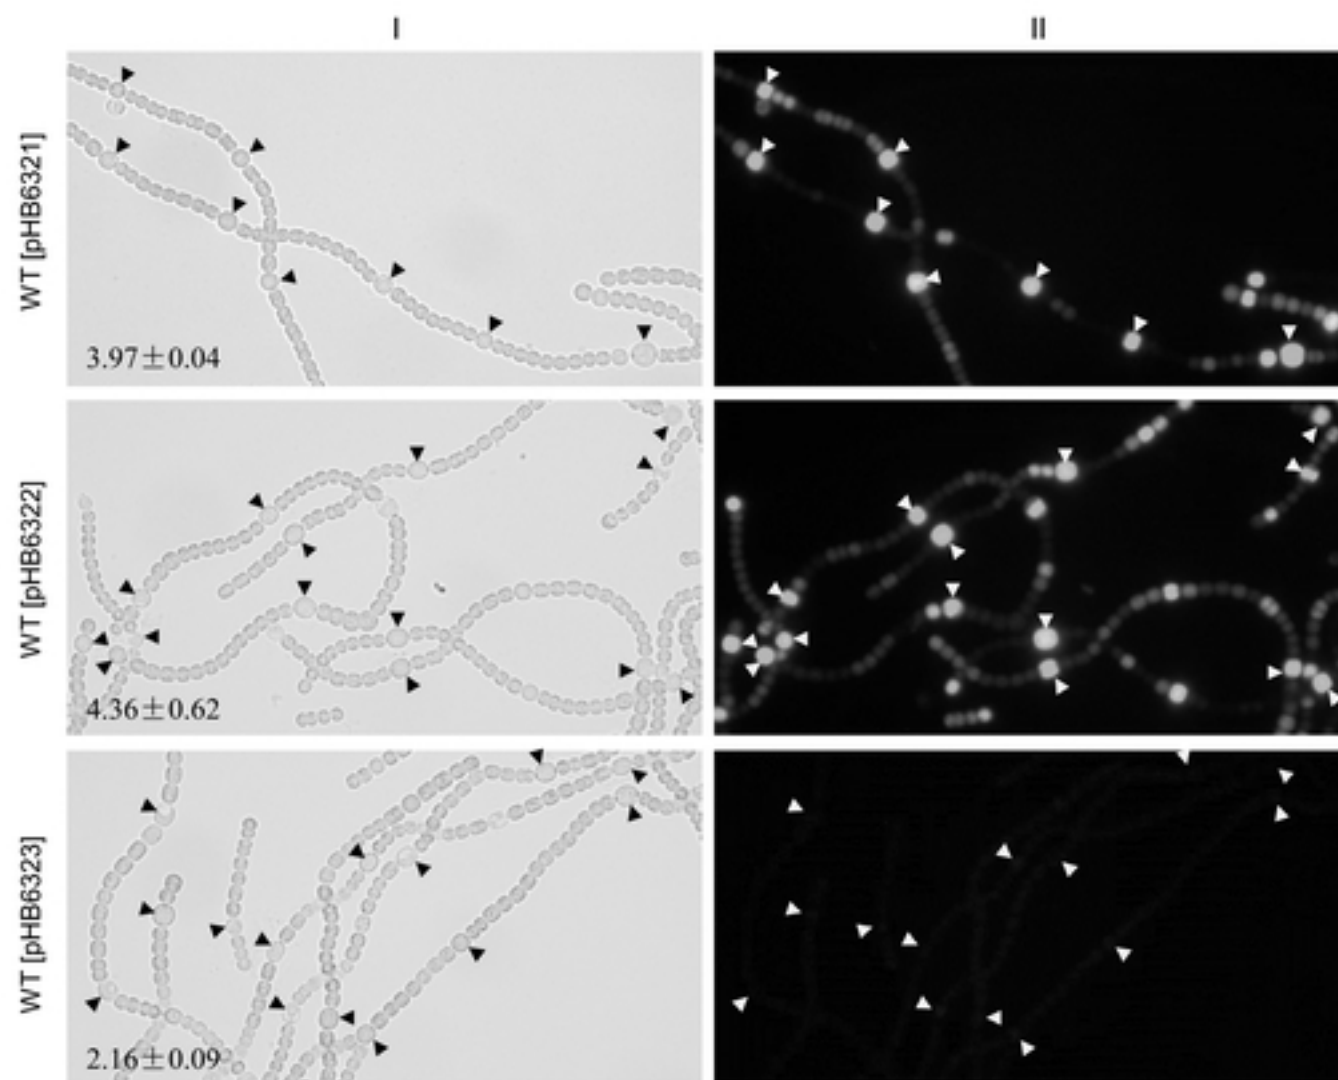

Fig. 3

Fig3

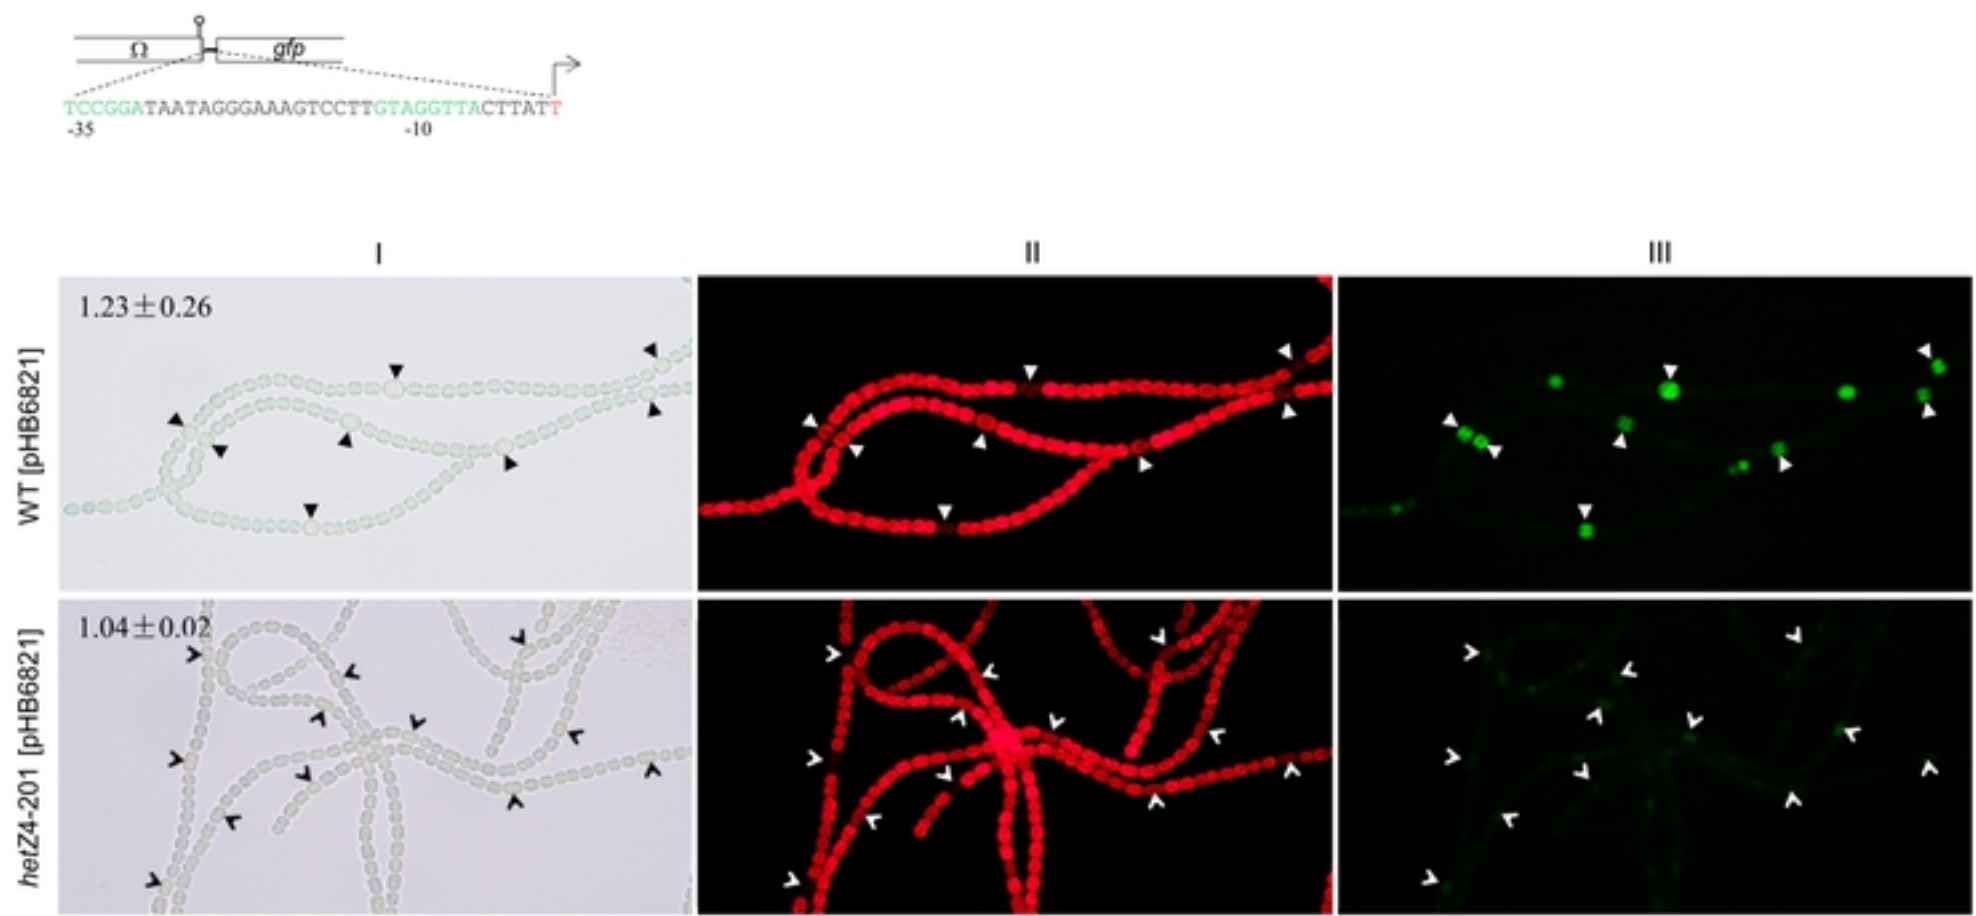

Fig. 4

Fig4

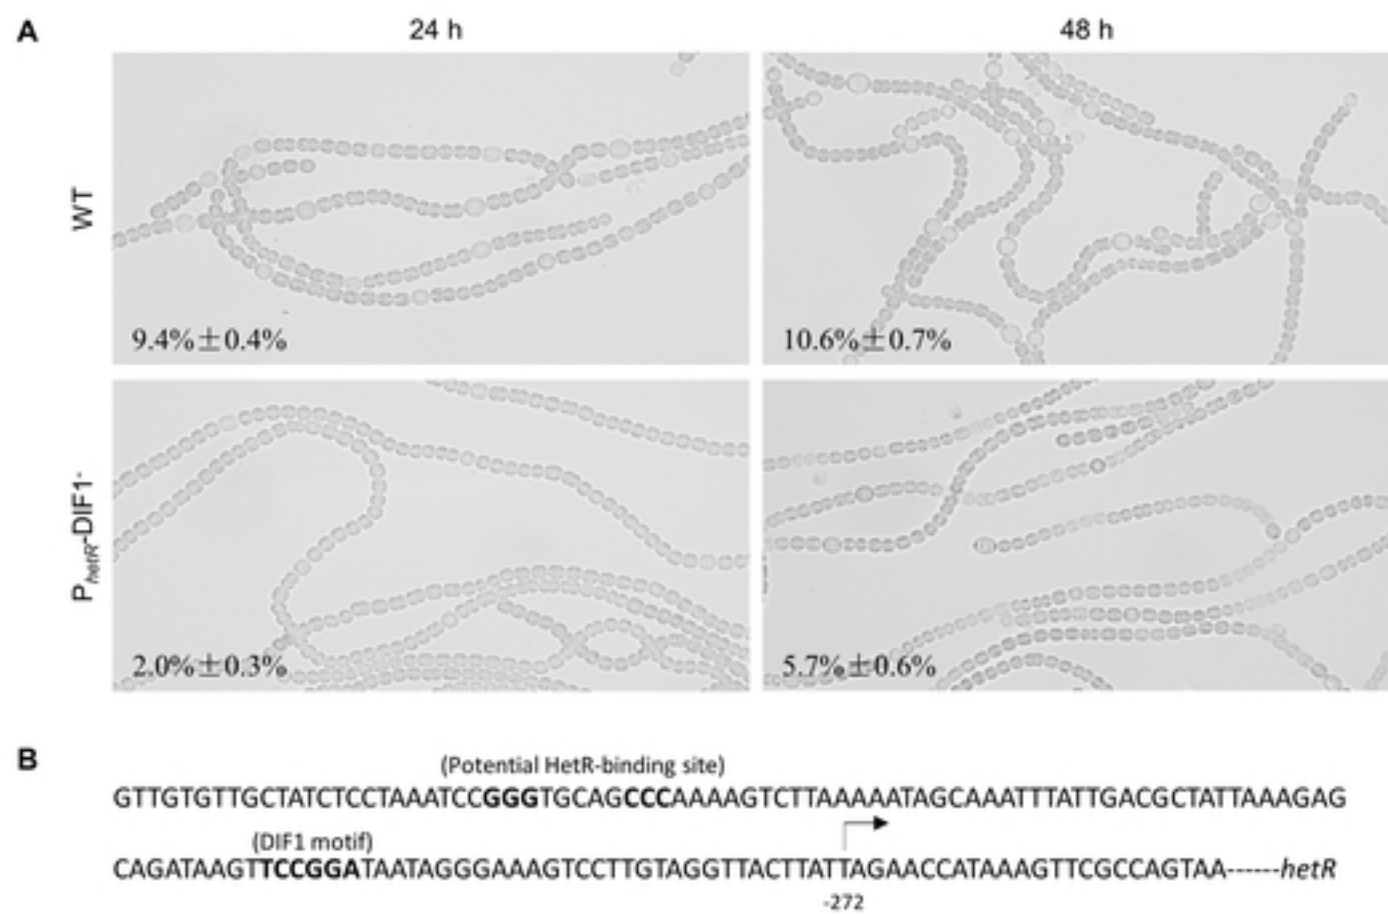

Fig. 5

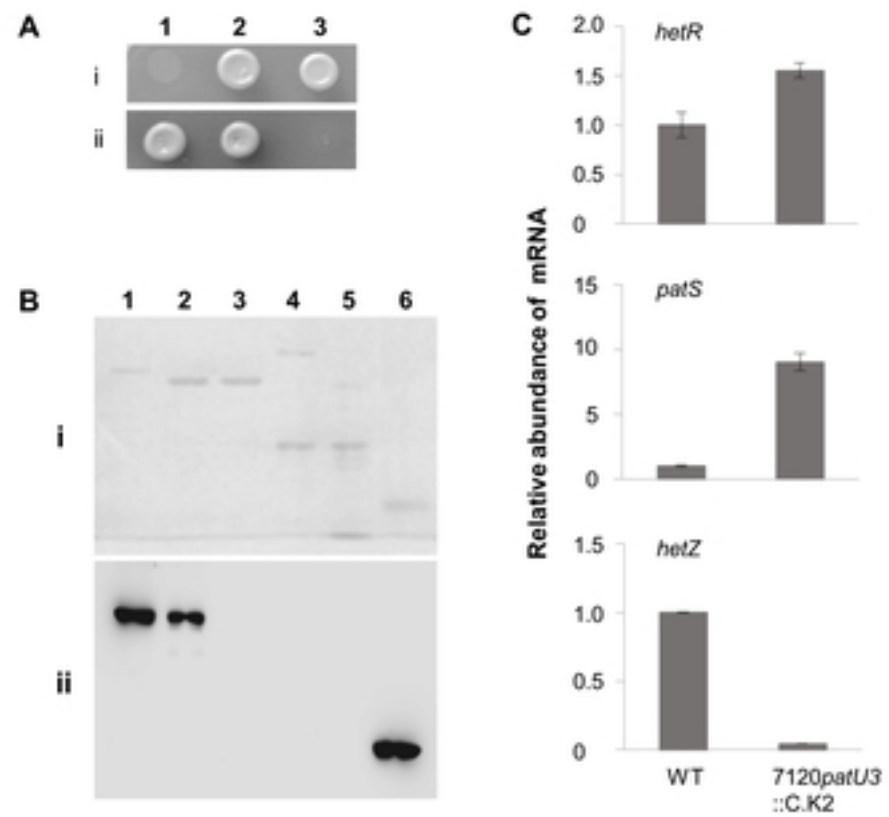

Fig. 6
